# Supplementary material for: Characterisation of the Filler Fraction in CAD/CAM Resin-Based Composites
Source: MDPI journal article supplement (doi:10.3390/ma14081986), 2021-04-15
Supplement: s1 [file s1]

# Characterisation of the Filler Fraction in CAD/CAM Resin-Based Composites

Andreas Koenig <sup>1,\*</sup>, Julius Schmidtke <sup>1,†</sup>, Leonie Schmohl <sup>1</sup>, Sibylle Schneider-Feyrer <sup>2</sup>, Martin Rosentritt <sup>2</sup>, Hieronymus Hoelzig <sup>3</sup>, Gert Kloess <sup>3</sup>, Ketpat Vejjasilpa <sup>4</sup>, Michaela Schulz-Siegmund <sup>4</sup>, Florian Fuchs <sup>1</sup> and Sebastian Hahnel <sup>1</sup>

<sup>1</sup> Department of Dental Prosthetics and Materials Science, Leipzig University, 04103 Leipzig, Germany; Julius.Schmidtke@medizin.uni-leipzig.de (J.S.); Leonie.Schmohl@medizin.uni-leipzig.de (L.S.); Florian.Fuchs@medizin.uni-leipzig.de (F.F.); sebastian.hahnel@medizin.uni-leipzig.de (S.H.)

<sup>2</sup> Department of Prosthetic Dentistry, Regensburg University Medical Centre, 93042 Regensburg, Germany; Sibylle.Schneider-Feyrer@klinik.uni-regensburg.de (S.S.-F.); martin.rosentritt@klinik.uni-regensburg.de (M.R.)

<sup>3</sup> Institute of Mineralogy, Crystallography and Materials Science, Leipzig University, 04275 Leipzig, Germany; hieronymus.hoelzig@uni-leipzig.de (H.H.); kloess@uni-leipzig.de (G.K.)

<sup>4</sup> Institute of Pharmacy, Pharmaceutical Technology, Leipzig University, 04317 Leipzig, Germany; kv38gaxo@studserv.uni-leipzig.de (K.V.); schulz@uni-leipzig.de (M.S.-S.)

\* Correspondence: akoenig@uni-leipzig.de

† These authors contribute equally as first authors

**Table S1.** Particle size and sphericity distribution.

| Distribution<br>Feret Diameter<br>in $\mu\text{m}$ | CBC_A2LT |       | CBC_A2HT |       | SB_A2LT |       | SB_A2HT |       |
|----------------------------------------------------|----------|-------|----------|-------|---------|-------|---------|-------|
|                                                    | Area     | Circ. | Area     | Circ. | Area    | Circ. | Area    | Circ. |
| 0-1                                                | 26.43    | 0.67  | 24.56    | 0.66  | 6.31    | 0.81  | 4.34    | 0.77  |
| 1-2                                                | 16.32    | 0.65  | 16.94    | 0.61  | 10.35   | 0.83  | 9.12    | 0.80  |
| 2-3                                                | 2.06     | 0.58  | 3.91     | 0.47  | 3.57    | 0.82  | 9.19    | 0.78  |
| 3-4                                                | 0.00     | 0.00  | 1.17     | 0.59  | 5.48    | 0.83  | 1.61    | 0.66  |
| 4-5                                                | 0.00     | 0.00  | 0.00     | 0.00  | 8.52    | 0.79  | 13.09   | 0.64  |
| 5-6                                                | 0.00     | 0.00  | 0.00     | 0.00  | 8.39    | 0.81  | 0.00    | 0.00  |
| 6-7                                                | 0.00     | 0.00  | 0.00     | 0.00  | 6.21    | 0.87  | 6.01    | 0.72  |
| 7-8                                                | 0.00     | 0.00  | 0.00     | 0.00  | 8.81    | 0.90  | 0.00    | 0.00  |
| 8-9                                                | 0.00     | 0.00  | 0.00     | 0.00  | 8.59    | 0.88  | 0.00    | 0.00  |
| 9-10                                               | 0.00     | 0.00  | 0.00     | 0.00  | 0.00    | -1.00 | 7.77    | 0.68  |
| >10                                                | 0.00     | 0.00  | 0.00     | 0.00  | 8.21    | 0.76  | 20.09   | 0.62  |
| Total                                              | 44.80    | -     | 46.58    | -     | 74.44   | -     | 71.22   | -     |

**Table S2.** Particle size and sphericity distribution.

| Distribution<br>Feret Diameter<br>in mm | GCC_A2LT |       | GCC_A2HT |       | TC_A2MT |       | TC_A2HT |       |
|-----------------------------------------|----------|-------|----------|-------|---------|-------|---------|-------|
|                                         | Area     | Circ. | Area     | Circ. | Area    | Circ. | Area    | Circ. |
| 0-1                                     | 34.93    | 0.66  | 33.24    | 0.67  | 20.25   | 0.64  | 21.22   | 0.66  |
| 1-2                                     | 4.06     | 0.50  | 3.91     | 0.55  | 18.28   | 0.57  | 17.52   | 0.53  |
| 2-3                                     | 0.17     | 0.28  | 0.00     | 0.00  | 5.86    | 0.45  | 5.86    | 0.48  |
| 3-4                                     | 0.00     | 0.00  | 0.00     | 0.00  | 1.15    | 0.45  | 0.34    | 0.38  |
| 4-5                                     | 0.00     | 0.00  | 0.00     | 0.00  | 0.00    | 0.00  | 0.00    | 0.00  |
| 5-6                                     | 0.00     | 0.00  | 0.00     | 0.00  | 0.00    | 0.00  | 0.00    | 0.00  |
| 6-7                                     | 0.00     | 0.00  | 0.00     | 0.00  | 0.00    | 0.00  | 0.00    | 0.00  |
| 7-8                                     | 0.00     | 0.00  | 0.00     | 0.00  | 0.00    | 0.00  | 0.00    | 0.00  |
| 8-9                                     | 0.00     | 0.00  | 0.00     | 0.00  | 0.00    | 0.00  | 0.00    | 0.00  |
| 9-10                                    | 0.00     | 0.00  | 0.00     | 0.00  | 0.00    | 0.00  | 0.00    | 0.00  |
| >10                                     | 0.00     | 0.00  | 0.00     | 0.00  | 0.00    | 0.00  | 0.00    | 0.00  |
| Total                                   | 39.17    | -     | 37.15    | -     | 45.54   | -     | 44.94   | -     |

**Table S3.** Particle size and sphericity distribution.

| Distribution<br>Feret Diameter<br>in mm | VGB_A2LT |       | VGB_A2HT |       | 3LU_A2LT |       | 3LU_A2HT |       | LC_A2 |       |
|-----------------------------------------|----------|-------|----------|-------|----------|-------|----------|-------|-------|-------|
|                                         | Area     | Circ. | Area     | Circ. | Area     | Circ. | Area     | Circ. | Area  | Circ. |
| 0-1                                     | 14.24    | 0.64  | 13.82    | 0.65  | 10.13    | 0.62  | 11.27    | 0.62  | 20.97 | 0.64  |
| 1-2                                     | 14.67    | 0.60  | 13.42    | 0.60  | 11.78    | 0.56  | 9.42     | 0.58  | 18.40 | 0.52  |
| 2-3                                     | 11.80    | 0.56  | 13.41    | 0.59  | 9.90     | 0.55  | 9.97     | 0.55  | 6.31  | 0.37  |
| 3-4                                     | 10.32    | 0.62  | 5.15     | 0.55  | 8.61     | 0.52  | 10.06    | 0.52  | 1.76  | 0.30  |
| 4-5                                     | 0.62     | 0.58  | 5.95     | 0.58  | 7.11     | 0.55  | 5.21     | 0.58  | 0.61  | 0.28  |
| 5-6                                     | 1.67     | 0.60  | 0.00     | 0.00  | 15.69    | 0.54  | 6.33     | 0.32  | 0.00  | 0.00  |
| 6-7                                     | 0.00     | 0.00  | 0.00     | 0.00  | 2.54     | 0.40  | 3.97     | 0.66  | 0.00  | 0.00  |
| 7-8                                     | 0.00     | 0.00  | 0.00     | 0.00  | 0.00     | 0.00  | 8.57     | 0.37  | 0.00  | 0.00  |
| 8-9                                     | 0.00     | 0.00  | 0.00     | 0.00  | 0.00     | 0.00  | 2.33     | 0.23  | 0.00  | 0.00  |
| 9-10                                    | 0.00     | 0.00  | 0.00     | 0.00  | 0.00     | 0.00  | 0.00     | 0.00  | 0.00  | 0.00  |
| >10                                     | 0.00     | 0.00  | 0.00     | 0.00  | 0.00     | 0.00  | 0.00     | 0.00  | 0.00  | 0.00  |
| Total                                   | 53.32    | -     | 51.75    | -     | 65.77    | -     | 67.12    | -     | 48.04 | -     |

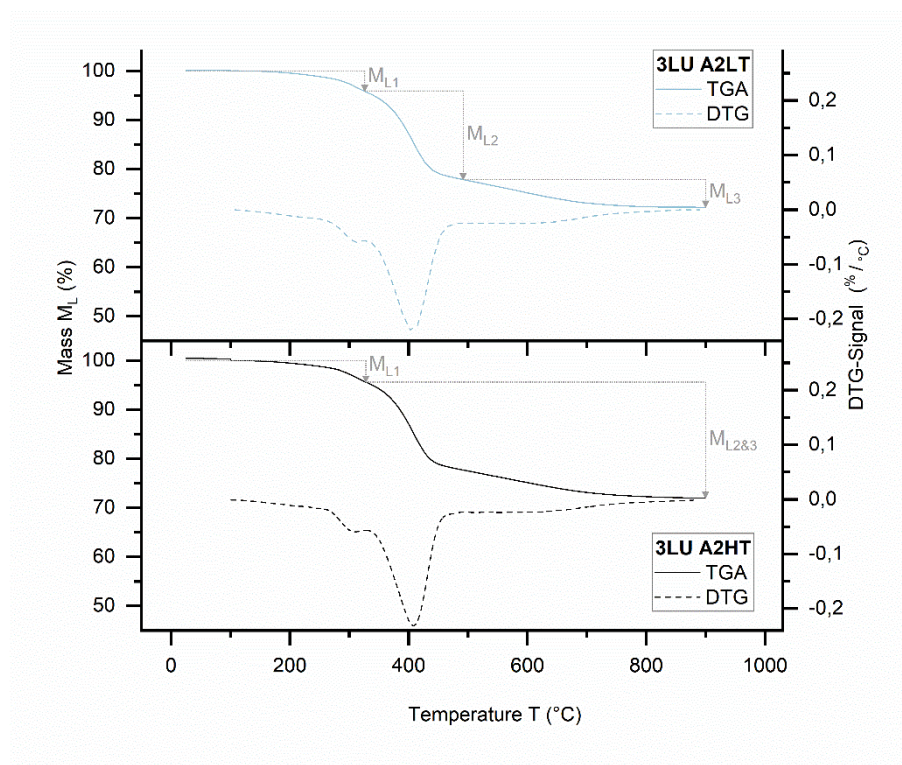

Figure S1. TG graphs of 3LU.

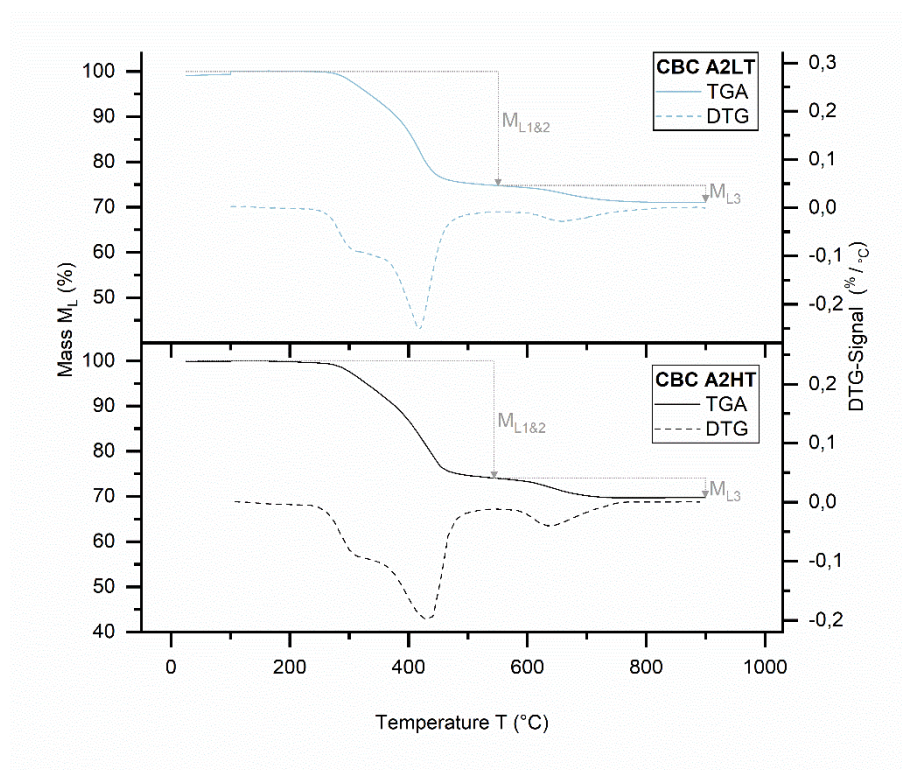

Figure S2. TG graphs of CBC.

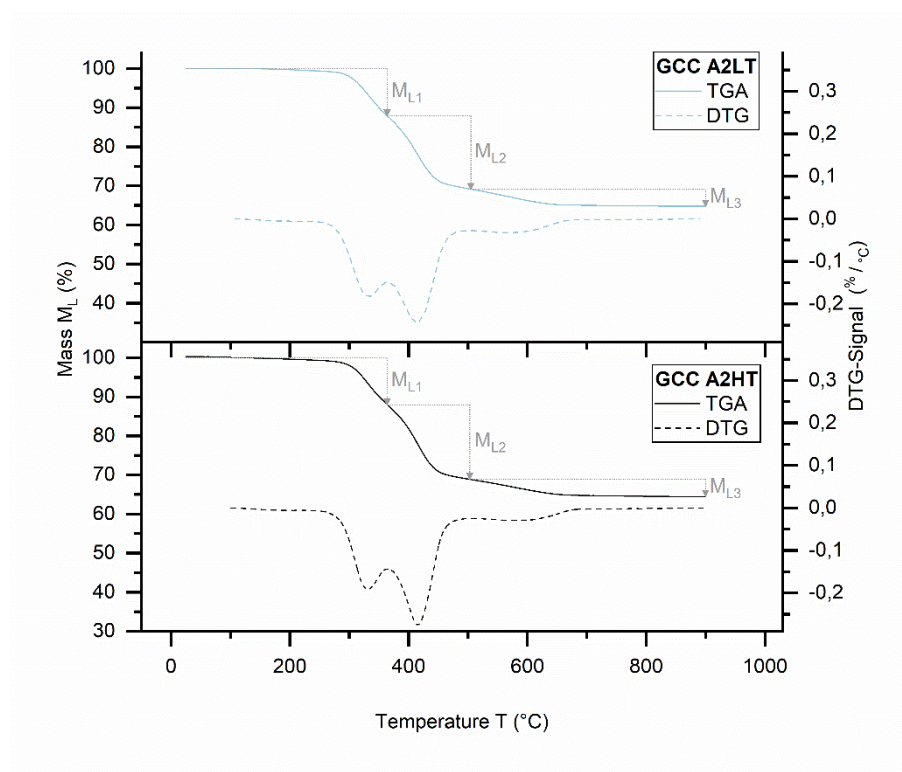

Figure S3. TG graphs of GCC.

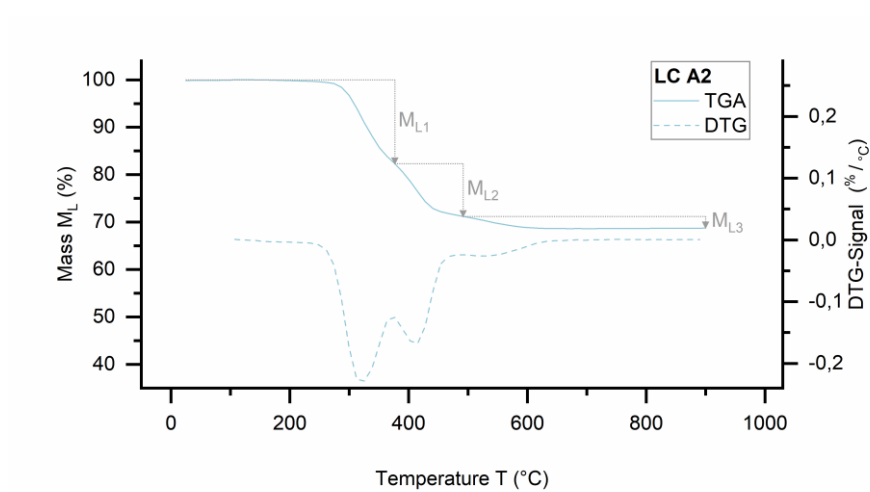

Figure S4. TG graphs of LC.

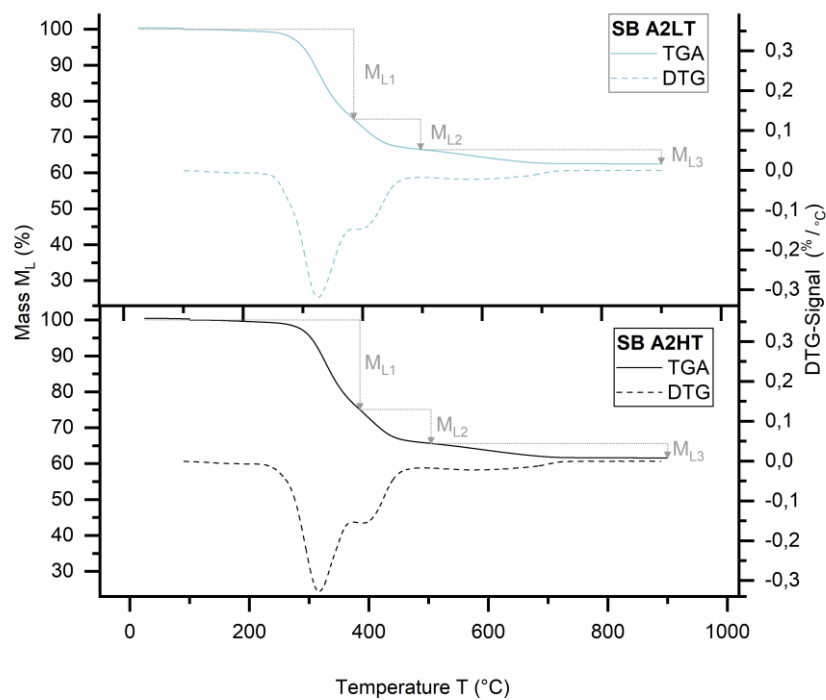

Figure S5. TG graphs of SB.

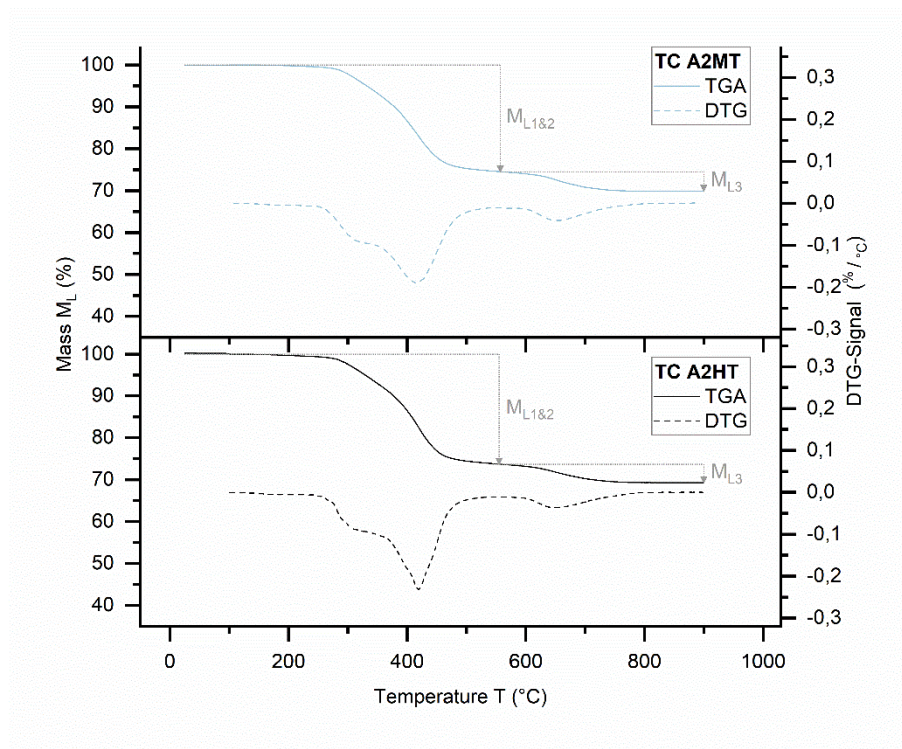

Figure S6. TG graphs of TC.

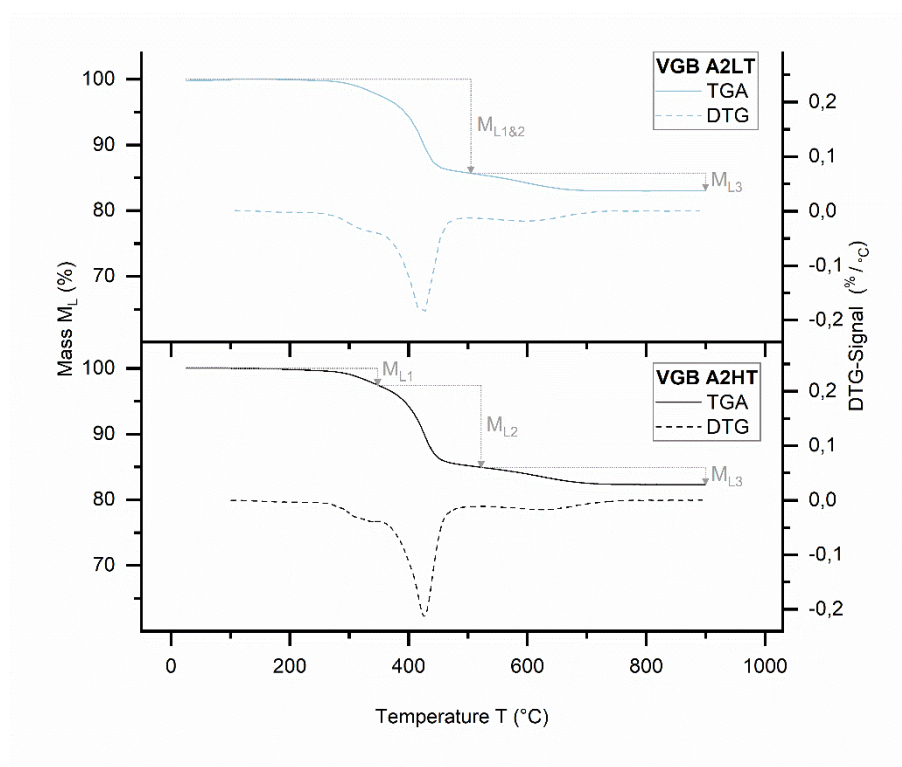

Figure S7. TG graphs of VGB.

**Table S4.** TG analysis in detail.

| 3LU A2LT                     | Total  | Step 1 | Step 2 | Step 3 | Step 4 |
|------------------------------|--------|--------|--------|--------|--------|
| Weight $m_s$ in mg           | 13.247 |        |        |        |        |
| Start point $T_A$ in °C      | 256    | 256    | 326    | 492    |        |
| End point $T_B$ in °C        | 714    | 326    | 492    | 714    |        |
| Peak temperature $T_P$ in °C | -      | 313    | 403    | 595    |        |
| Mass loss $M_L$ in %         | 27.7   | 4,1    | 18,0   | 5.6    |        |
| 3LU A2HT                     | Total  | Step 1 | Step 2 | Step 3 | Step 4 |
| Weight $m_s$ in mg           | 13.389 |        |        |        |        |
| Start point $T_A$ in °C      | 255    | 255    | 328    |        |        |
| End point $T_B$ in °C        | 732    | 328    | 732    |        |        |
| Peak temperature $T_P$ in °C | -      | 312.5  | 407    | 563    |        |
| Mass loss $M_L$ in %         | 28.0   | 4.4    | 23.6   |        |        |
| VGB A2LT                     | Total  | Step 1 | Step 2 | Step 3 | Step 4 |
| Weight $m_s$ in mg           | 13.439 |        |        |        |        |
| Start point $T_A$ in °C      | 284    |        | 284    | 505    |        |
| End point $T_B$ in °C        | 662    |        | 505    | 662    |        |
| Peak temperature $T_P$ in °C |        | 326    | 428    | 595    |        |
| Mass loss $M_L$ in %         | 16.9   |        | 14.3   | 2.6    |        |
| VGB A2HT                     | Total  | Step 1 | Step 2 | Step 3 | Step 4 |
| Weight $m_s$ in mg           | 13.635 |        |        |        |        |
| Start point $T_A$ in °C      | 283    | 283    | 348    | 522    |        |
| End point $T_B$ in °C        | 692    | 348    | 522    | 692    |        |
| Peak temperature $T_P$ in °C |        | 340    | 426    | 629    |        |
| Mass loss $M_L$ in %         | 17.7   | 2.6    | 12.5   | 2.6    |        |

Table S4. continued.

| TC A2MT                      | Total  | Step 1 | Step 2 | Step 3 | Step 4 |
|------------------------------|--------|--------|--------|--------|--------|
| Weight $m_s$ in mg           | 14.280 |        |        |        |        |
| Start point $T_A$ in °C      | 276    |        | 276    | 557    |        |
| End point $T_B$ in °C        | 714    |        | 557    | 714    |        |
| Peak temperature $T_P$ in °C |        | 313    | 415    | 659    |        |
| Mass loss $M_L$ in %         | 30.1   |        | 25.5   | 4.6    |        |
| TC A2HT                      | Total  | Step 1 | Step 2 | Step 3 | Step 4 |
| Weight $m_s$ in mg           | 13.797 |        |        |        |        |
| Start point $T_A$ in °C      | 275    |        | 275    | 555    |        |
| End point $T_B$ in °C        | 719    |        | 555    | 719    |        |
| Peak temperature $T_P$ in °C |        | 323    | 419    | 650    |        |
| Mass loss $M_L$ in %         | 30.7   |        | 26.3   | 4.4    |        |
| SB A2LT                      | Total  | Step 1 | Step 2 | Step 3 | Step 4 |
| Weight $m_s$ in mg           | 12.651 |        |        |        |        |
| Start point $T_A$ in °C      | 289    | 289    | 385    | 497    |        |
| End point $T_B$ in °C        | 683    | 385    | 497    | 683    |        |
| Peak temperature $T_P$ in °C |        | 326    | 394    | 571    |        |
| Mass loss $M_L$ in %         | 37.5   | 25.0   | 8.5    | 4.0    |        |
| SB A2HT                      | Total  | Step 1 | Step 2 | Step 3 | Step 4 |
| Weight $m_s$ in mg           | 13.686 |        |        |        |        |
| Start point $T_A$ in °C      | 291    | 291    | 385    | 504    |        |
| End point $T_B$ in °C        | 696    | 385    | 504    | 696    |        |
| Peak temperature $T_P$ in °C |        | 327    | 399    | 599    |        |
| Mass loss $M_L$ in %         | 38.4   | 24.9   | 9.5    | 4.0    |        |



Table S4. continued.

| LC A2                        | Total  | Step 1 | Step 2 | Step 3 | Step 4 |
|------------------------------|--------|--------|--------|--------|--------|
| Weight $m_s$ in mg           | 12.652 |        |        |        |        |
| Start point $T_A$ in °C      | 286    | 286    | 377    | 492    |        |
| End point $T_B$ in °C        | 591    | 377    | 492    | 591    |        |
| Peak temperature $T_P$ in °C |        | 326    | 415    | 518    |        |
| Mass loss $M_L$ in %         | 31.2   | 17.7   | 11.1   | 2.4    |        |
| GCC A2LT                     | Total  | Step 1 | Step 2 | Step 3 | Step 4 |
| Weight $m_s$ in mg           | 13.305 |        |        |        |        |
| Start point $T_A$ in °C      | 294    | 294    | 364    | 505    |        |
| End point $T_B$ in °C        | 643    | 364    | 505    | 643    |        |
| Peak temperature $T_P$ in °C |        | 338    | 415    | 569    |        |
| Mass loss $M_L$ in %         | 35.2   | 12.1   | 18.8   | 4.3    |        |
| GCC A2HT                     | Total  | Step 1 | Step 2 | Step 3 | Step 4 |
| Weight $m_s$ in mg           | 12.519 |        |        |        |        |
| Start point $T_A$ in °C      | 297    | 297    | 365    | 503    |        |
| End point $T_B$ in °C        | 657    | 365    | 503    | 657    |        |
| Peak temperature $T_P$ in °C |        | 331    | 416    | 579    |        |
| Mass loss $M_L$ in %         | 35.5   | 12.1   | 19.0   | 4.4    |        |
| CBC A2LT                     | Total  | Step 1 | Step 2 | Step 3 | Step 4 |
| Weight $m_s$ in mg           | 12.943 |        |        |        |        |
| Start point $T_A$ in °C      | 275    |        | 275    | 439    | 547    |
| End point $T_B$ in °C        | 704    |        | 439    | 547    | 704    |
| Peak temperature $T_P$ in °C |        | 311    | 417    | 448    | 645    |
| Mass loss $M_L$ in %         | 30.6   |        | 21.0   | 5.3    | 4.3    |

Table S4. continued.

| CBC A2HT                     | Total  | Step 1 | Step 2 | Step 3 | Step 4 |
|------------------------------|--------|--------|--------|--------|--------|
| Weight $m_s$ in mg           | 13.595 |        |        |        |        |
| Start point $T_A$ in °C      | 275    |        | 275    | 544    |        |
| End point $T_B$ in °C        | 694    |        | 544    | 694    |        |
| Peak temperature $T_P$ in °C |        | 313    | 428    | 634    |        |
| Mass loss $M_L$ in %         | 30.2   |        | 25.9   | 4.3    |        |
